# Supplementary material for: Genetic disorders caused by consanguineous marriage in Radfan districts – Yemen
Source: BMC Med Genomics. 2025 Dec 24;18:199. doi: 10.1186/s12920-025-02267-5 (PMC12729813; doi:10.1186/s12920-025-02267-5)
Supplement: Supplementary file 1 — Supplementary Material 1 [file 12920_2025_2267_MOESM1_ESM.xlsx]

## Sheet: ورقة1
م	عمر الاب	عمر الام	صلة القرابة		سنوات الزواج	الأطفال المصابين	نوعية الإصابة	الاجهاضات	الوفيات	المنطقة	المستوى التعليمي
1	45	40	بنت العم		19	1	اصم			ريف	ثانوية
2	40	34	بنت الجد		17	3	اصم			ريف	جامعي
3	43	40	بنت الخالة		20	1	تكسرات بالدم	4		ريف	ثانوية
4	50	45	بنت العمة		27	1	تكسرات بالدم ضعف نظر			مدينة	أساسي
5	55	52	بنت العمة		39	1	منغولي			ريف	أساسي
6	40	38	بنت العمة		20	2	اصم ابكم			مدينة	ثانوية
7	56	54	بنت العمة		32	2	اصم ابكم			ريف	أساسي
8	29	23	بنت العم		7	1	تشوة خلقي			ريف	ثانوية
9	30	27	بنت العمة		6			3		ريف	جامعي
10	45	40	بنت العم		18	4	انفتاح القناة الدماغية	2	2	ريف	ثانوية
11	33	30	بنت خالة		14	1	فتحة في القلب	1	1	ريف	ثانوية
12	35	32	بنت العم		16	1	فتحة في القلب	1	2	ريف	أساسي
13	50	42	بنت العم		18	3	معاقين وتقزم			ريف	أساسي
14	40	32	بنت الخال		12			4		مدينة	أساسي
15	35	26	بنت الخال		8			3		مدينة	أساسي
16	45	40	بنت الخال		13	3	إعاقة وعقم			ريف	ثانوية
17	30	25	بنت الخال		7			2		ريف	ثانوية
18	40	37	بنت العم		16	2	فقر دم			ريف	ثانوية
19	47	42	بنت الخال		23	3	إعاقة في بعض أجزاء الجسم		1	ريف	أساسي
20	50	47	بنت العم		26	2	تشوة العينين وعقم			ريف	أساسي
21	55	50	بنت خالة		30	3	عقم وحالة نفسية			مدينة	ثانوية
22	30	27	بنت العمة		10	1	فقر دم	2		مدينة	أساسي
23	35	30	بنت العم		10	1	فتحة في القلب			ريف	ثانوية
24	33	28	بنت العم		7			1		ريف	أساسي
25	50	47	بنت العم		30			3		مدينة	ثانوية
26	47	45	بنت العم		20			1	1	مدينة	ثانوية
27	40	37	بنت العم		12			1		ريف	جامعي
28	35	30	بنت الخال		8	2	تكسرات قلب			ريف	اعدادي
29	45	40	بنت الخالة		20	2	ضمور			مدينة	ثانوية
30	50	45	بنت الخال		25	1	ضمور بالدماغ	1		مدينة	اعدادي
31	52	47	بنت الخال		20	1	تشوة خلقي	2	2	ريف	اعدادي
32	60	45	بنت الخال		20	1	خلل عقلي			ريف	اعدادي
33	48	40	بنت الخال		20			3	3	ريف	ثانوية
34	40	30	بنت العم		14			1	2	ريف	ثانوية
35	65	60	بنت العم		40			5	4	ريف	جامعي
36	50	42	بنت العم		20			2		ريف	جامعي
37	48	33	بنت العم		16	1	#	3		ريف	جامعي
38	72	63	بنت العم		45			2	1	ريف	ثانوية
39	68	65	بنت العم		43			2		ريف	أساسي
40	41	30	بنت العم		15	1	فقر دم			ريف	ثانوية
41	38	29	بنت العم		13	1	فقر دم			ريف	ثانوية
42	24	21	بنت العم		3	1	نقص جسماني			مدينة	اعدادي
43	48	40	بنت العم		20	1	نقص عقلي			مدينة	اعدادي
44	50	48	بنت الخال		28	3	#		3	مدينة	بدون
45	38	34	بنت ابن الخالة		20	2	اصم ابكم			مدينة	بدون
46	23	21	بنت عم		4			1		مدينة	بدون
47	32	30	بنت عم		10			1		مدينة	اعدادي
48	27	23	بنت عم		5			2		مدينة	أساسي
49	33	30	بنت خالة		10			1		مدينة	ثانوية
50	45	41	بنت خال		25	1	ضعف جسمي			مدينة	بدون
51	51	43	بنت عم		30	2	تكسرات			ريف	جامعي
52	42	40	بنت عم		18				1	ريف	ثانوية
53	40	35	بنت عمة		15	2	عدم الحركة		2	مدينة	ثانوية
54	45	42	بنت عمة		20			1	1	مدينة	ثانوية
55	45	42	بنت خالة		13	1	انسداد الامعا		1	مدينة	أساسي
56	46	37	بنت خال		11	1	التفاف الرجل	1		مدينة	استسي
57	50	42	بنت خال		20				1	مدينة	جامعي
58	50	40	بنت عم		19	2	العشاء اليلي	2		ريف	أساسي
59	48	45	بنت عم		23	1	ضغف النظر			ريف	أساسي
60	33	27	بنت عم		10	2	تكسرات بالدم	1	1	ريف	ثانوية
61	57	50	بنت عم		37	3	تكسرات بالدم		1	ريف	أساسي
62	62	52	بنت عم		38	4	تشوة خلقي اختلال عقلي			ريف	ثانوية
63	42	40	بنت عم		15			2		ريف	ثانوية
64	45	43	بنت عمة		20	1	ثقب بالرءة			ريف	أساسي
65	60	57	بنت خالة		32				3	ريف	بدون
66	46	37	بنت عم		20	1	تكسرات		2	ريف	اعدادي
67	45	38	بنت خال		18	3	عمى وشحنات			ريف	ثانوية
68	35	37	بنت عم		10			2		ريف	ثانوية
69	29	25	بنت خال		5	1	صعوبة المشي			مدينة	ثانوية
70	75	73	بنت خالة		50	3	ضعف نظر عمى	1		ريف	بدون
71	37	33	بنت عم		7	1	تكسرات بالدم			مدينة	ثانوية
72	39	33	بنت عم		13			2		مدينة	جامعي
73	48	40	بنت عم		22			5		مدينة	ثانوية
74	40	36	بنت خال		15			3		مدينة	جامعي
75	65	50	بنت عم		32	2	تكسرات	1		ريف	ثانوية
76	60	55	بنت عم		30				1	ريف	اعدادي
77	50	45	بنت خالة		28			4	3	ريف	أساسي
78	60	55	بنت خالة		32	1	تشوة بالعين			ريف	بدون
79	30	25	بنت جد		10			2		ريف	اعدادي
80	50	45	بنت خال		21			1		ريف	اعدادي
81	62	55	بنت خال		35				1	ريف	بدون
82	70	60	بنت عمة		40	1	صغر بالعين			ريف	أساسي
83	50	43	بنت عمة		25				1	ريف	اعدادي
84	52	50	بنت عمة		15			1		ريف	اعدادي
85	40	38	بنت خال		20				1	ريف	ثانوية
86	34	28	بنت جد		11	1	إعاقة جسدية		1	ريف	جامعي
87	26	24	بنت عم		4			1		ريف	ثانوية
88	35	30	بنت عمة		12			1	2	ريف	ثانوية
89	35	28	بنت عمة		8			1		مدينة	اعدادي
90	40	35	بنت خال		12	1	إعاقة الرجلين			ريف	أساسي
91	40	32	بنت جد		20	1	إعاقة الرجلين	1		ريف	ثانوية
92	35	23	بنت عم		12	1	إعاقة الرجلين			ريف	ثانوية
93	35	27	بنت خال		7	1	هشاشة العضام		1	ريف	ثانوية
94	35	40	بنت خال		20	2	صم بكم			ريف	أساسي
95	68	65	بنت خال		50	1	تكسرات			ريف	أساسي
96	55	50	بنت خالة		40			3		ريف	أساسي
97	50	45	بنت عم		30	1	تكسرات			ريف	ثانوية
98	60	58	بنت عمة		40	2	حالة نفسية			ريف	ثانوية
99	38	36	بنت خال		20	1	فيروس			ريف	أساسي
100	69	68	بنت خال		55	2	ضعف نظر			ريف	ثانوية
101	58	46	بنت العمه		30			2		ريف	أساسي
102	55	56	بنت خال		40	2	تكسرات			ريف	جامعي
103	52	50	بنت خال		30	1	تشوة خلقي		1	ريف	أساسي
104	55	50	بنت خال		25	1	منقولي		1	ريف	أساسي
105	30	22	بنت الجد		3			2		ريف	أساسي
106	31	30	بنت عم		6			2		ريف	جامعي
107	30	29	بنت خال					2		ريف	ثانوية
108	50	45	بنت عم		25	1	تشوة خلقي			ريف	أساسي
109	32	28	بنت جد		4			2		ريف	جامعي
110	50	50	بنت جد		30	1	تشوة خلقي			ريف	أساسي
111	50	52	بنت عم		25	1	تشوة بالعين			مدينة	ثانوية
112	40	35	بنت عم		15	1	اعمى			ريف	ثانوية
113	27	20	بنت خال		5			1		مدينة	امي
114	33	25	بنت عم		10	2	شحنات إعاقة			ريف	ثانوية
115	45	40	بنت عم		27	2	إعاقة			ريف	ثانوية
116	46	42	بنت عم		20			4	1	ريف	جامعي
117	40	42	بنت عم		13	1	إعاقة	2		ريف	جامعي
118	39	20	بنت عم		10	1	إعاقة	1		ريف	جامعي
119	25	29	بنت خال		7			1		ريف	امي
120	30	25	بنت عم		5	1	إعاقة			ريف	جامعي
121	40	36	بنت عم		20	1	تكسرات			ريف	أساسي
122	32	29	بنت عمة		10	1	اختلال عقلي			مدينة	امي
123	39	29	بنت خالة		10	2	اختلال عقلي			مدينة	امي
124	57	50	بنت عمة		21	3	تكسرات	1	1	ريف	امي
125	52	45	بنت عمة		18	2	تكسرات	1		ريف	ثانوية
126	49	40	بنت خالة		23	1	اختلال عقلي	1		ريف	امي
127	45	52	بنت عمة		28	2	اختلال عقلي			ريف	امي
128	27	25	بنت عمة		8	1	تكسرات			ريف	امي
129	48	40	بنت خالة		23	3	القلب ضعف نظر			ريف	ثانوية
130	37	25	بنت عمة		9	1	ضمور بالدماغ			ريف	أساسي
131	40	38	بنت عم		20	1	صفار			ريف	ثانوية
132	73	68	بنت عم		49	2	سرطان		2	ريف	أساسي
133	32	17	بنت عم		3			2	2	ريف	امي
134	44	35	بنت خالة		23	1	عقم			ريف	امي
135	44	32	بنت عم		14	1	ضمور بالدماغ			ريف	امي
136	56	43	بنت عم		28	2	برص	2		مدينة	ثانوية
137	78	72	بنت عم		52	2	برص			ريف	ثانوية
138	29	22	بنت خالة		7	2	تكسرات	1	2	ريف	امي
139	47	33	بنت عم		13	4	ربو			ريف	أساسي
140	48	37	بنت عم		12	1	اصم			ريف	أساسي
141	33	28	بنت عم		12	2	فقر دم	1	1	ريف	أساسي
142	40	36	بنت خالة		16			3		ريف	امي
143	35	30	بنت عم		10	1	ضمور بالدماغ		1	ريف	امي
144	60	40	بنت خالة		21	1	تشوة خلقي	2	1	ريف	امي
145	37	24	بنت عم		17	2	تشوة خلقي		2	ريف	امي
146	37	24	بنت عم		8	1	برص			ريف	امي
147	55	47	بنت خالة		30	1	فشل كلوي	2		ريف	ثانوية
148	45	38	بنت خالة		23	2	إعاقة			ريف	أساسي
149	28	23	بنت خالة		6	1	تكسرات			ريف	امي
150	23	20	بنت عم		4	1	تكسرات			ريف	امي
151	32	20	بنت جد		6	1	تشوة خلقي			ريف	امي
152	42	32	بنت خال		18	3	ضعف نظر	1		ريف	أساسي
153	22	19	بنت عم		5	3	بكتيريا بالدم		3	مدينة	امي
154	43	35	بنت عم		19	1	القلب	1	1	ريف	أساسي
155	60	65	بنت خال		35	2	شحنات			ريف	ثانوية
156	39	35	بنت عم		14	2	ضعف نظر	1		ريف	أساسي
157	65	60	بنت عم		43	2	القلب	1		ريف	ثانوية
158	45	26	بنت خال		5	1	اصم	2		ريف	امي
159	32	20	بنت عم		6	1	عقم			ريف	امي
160	58	55	بنت خال		25	2	منقولي	2		ريف	ثانوية
161	45	40	بنت عم		20	3	فقر دم		1	مدينة	ثانوية
162	30	28	بنت عم		10	1	مرض جلدي	2		مدينة	جامعي
163	50	45	بنت خال		30	2	اختلال عقلي			ريف	ثانوية
164	35	30	بنت خالة		12	2	ثقب بالقلب	1		ريف	ثانوية
165	37	32	بنت خال		15	3	منقولي	2		مدينة	ثانوية
166	40	38	بنت خال		18	1	منقولي	1		مدينة	جامعي
167	53	48	بنت عم		25	2	تغزم		2	مدينة	أساسي
168	35	30	بنت عم		12	2	عقم	1		ريف	ثانوية
169	40	38	بنت عم		18			1		ريف	ثانوية
170	40	37	بنت عم		15	1	صعوبة المشي			ريف	ثانوية
171	44	30	بنت خال		5				1	ريف	اعدادي
172	60	55	بنت عمة		33			1	1	ريف	أساسي
173	40	41	بنت خال		19			2	1	ريف	ثانوية
174	35	29	بنت عم		9				1	ريف	جامعي
175	50	50	بنت عمة		32			1	1	ريف	أساسي
176	37	37	بنت عم		15	1	تشوة خلقي		1	ريف	أساسي
177	40	36	بنت خال		18			1	2	ريف	أساسي
178	30	26	بنت خال		8	1	اصم ابكم	1		ريف	أساسي
179	50	50	بنت عمة		30	2	تشوة خلقي		1	ريف	أساسي
180	31	26	بنت خال		6			2		مدينة	ثانوية
181	55	52	بنت خال		32			2		ريف	أساسي
182	35	30	بنت عم		14			2	1	ريف	ثانوية
183	38	30	بنت عم		15			1		ريف	جامعي
184	27	20	بنت عم		1			1		ريف	ثانوية
185	25	18	بنت خالة		2			3		ريف	ثانوية
186	25	18	بنت عمة		3	1	عقم			ريف	أساسي
187	27	18	بنت عم		2			1		ريف	ثانوية
188	40	38	بنت عم		20			2		ريف	أساسي
189	55	50	بنت عم		32	1	شحنات			ريف	اعدادي
190	45	41	بنت عمة		20	1	إعاقة الرجلين			ريف	ثانوية
191	50	45	بنت عم		25			3		ريف	جامعي
192	60	50	بنت عم		30			4		ريف	جامعي
193	63	53	بنت خال		33			6		ريف	جامعي
194	28	20	بنت خال		9			1		ريف	امي
195	33	32	بنت خال		10			2		ريف	امي
196	50	40	بنت جد		20			2		ريف	جامعي
197	70	60	بنت جد		40			1		ريف	جامعي
198	43	35	بنت عم		25			1		ريف	جامعي
199	29	20	بنت عم		2			2		ريف	امي
200	32	25	بنت عم		8			2		ريف	جامعي
201	45	39	بنت عم		20			1		ريف	جامعي
202	45	33	بنت خال		15			1		ريف	جامعي
203	32	20	بنت بنت عمة		10	1	قلب		1	ريف	جامعي
204	60	56	بنت خال		29			1		ريف	جامعي
205	39	30	بنت عم		12	1	قلب		1	ريف	جامعي
206	35	30	بنت عم		15			3		ريف	جامعي
207	30	25	بنت عم		13	1	قلب		1	ريف	جامعي
208	48	38	بنت عم		20			1		ريف	جامعي
209	52	42	بنت بنت عمة		30	4	تشوة خلقي		4	ريف	جامعي
210	50	42	بنت بنت عمة		30			1		ريف	جامعي
211	60	50	بنت عم		33	1	تشوة خلقي		1	ريف	جامعي
212	42	33	بنت عم		8			1		ريف	جامعي
213	33	27	بنت عم		10			1		ريف	جامعي
214	48	37	بنت عم		16			1		ريف	جامعي
215	60	45	بنت عم		34			3		ريف	جامعي
216	30	19	بنت عم		7			1		ريف	جامعي
217	48	36	بنت عم		10			1		ريف	جامعي
218	38	36	بنت عم		14	3	ثقب بالقلب عقم	1		ريف	ثانوية
219	50	47	بنت عم		28	2	مرض جلدي تخلف عقلي			ريف	أساسي
220	27	25	بنت عم		7			3		ريف	أساسي
221	34	30	بنت خال		12	1	منغولي	2		ريف	ثانوية
222	40	37	بنت عم		17	2	عقم مرض جلدي			ريف	ثانوية
223	48	44	بنت خال		22	3	بهق تخلف عقلي	1		ريف	أساسي
224	35	32	بنت خاله		11	1	تكسرات	2		ريف	ثانوية
225	26	22	بنت خال		4			2		ريف	ثانوية
226	55	50	بنت عم		30	2	تكسرات عقم	3		ريف	جامعي
227	38	25	بنت عم		5	2	تكسرات بالدم		2	ريف	ثانوية
228	54	43	بنت خاله		28	2	نقص بالعضل	2	1	ريف	أساسي
229	23	18	بنت خال		2			1		ريف	أساسي
230	33	26	بنت خال					1	1	ريف	أساسي
231	50	40	بنت عم		25	1	نقص بالعضل			مدينة	ثانوية
232	40	26	بنت عم		11			3		ريف	ثانوية
233	54	49	بنت خال		35	1	إعاقة			ريف	ثانوية
234	52	48	بنت عم		23	1	إعاقة			ريف	ثانوية
235	30	30	بنت عم		18	1	إعاقة			ريف	ثانوية
236	35	29	بنت خاله		11	2	إعاقة			ريف	ثانوية
237	42	38	بنت خاله		21			3		ريف	ثانوية
238	31	28	بنت عم		5			1		ريف	ثانوية
239	33	28	بنت عم		3	1	ثقب بالقلب		1	ريف	امي
240	34	26	بنت عم		8			1		ريف	امي
241	25	20	بنت عم		5			3		ريف	امي
242	28	24	بنت خال		4			2		مدينة	ثانوية
243	27	23	بنت عم		7			2		مدينة	أساسي
244	27	23	بنت خاله		6		التهاب السحاايا		1	مدينة	أساسي
245	26	23	بنت عم		6		فيروس كبدي		1	مدينة	أساسي
246	75	70	بنت عم		52				1	ريف	أساسي
247	70	68	بنت عم		49				1	ريف	أساسي
248	37	33	بنت عم		17				2	ريف	ثانوية
249	31	27	بنت خاله		11	1	شحنات		1	ريف	جامعي
250	32	21	بنت خاله		4			1		ريف	ثانوية
251	47	42	بنت عم		25				3	مدينة	ثانوية
252	60	60	بنت عم		37				1	مدينة	أساسي
253	47	39	بنت خال		22	1	إعاقة			مدينة	أساسي
254	30	24	بنت عم		9			1		مدينة	ثانوية
255	25	18	بنت خال		4			1		مدينة	ثانوية
256	50	39	بنت عمة		16			2		ريف	أساسي
257	55	40	بنت خال		24			1	1	ريف	ثانوية
258	45	38	بنت عم		10				1	مدينة	ثانوية
259	28	24	بنت خال		6			1		مدينة	ثانوية
260	50	45	بنت عم		18			1		ريف	امي
261	38	28	بنت عم		13			2	1	مدينة	جامعي
262	30	23	بنت عم		2			1		ريف	اعدادي
263	40	31	بنت خال		12			1		ريف	اعدادي
264	55	47	بنت خال		20			2		ريف	ثانوية
265	50	39	بنت عم		21	1	تكسرات بالدم	2		مدينة	أساسي
266	49	35	بنت خال		16			1		ريف	أساسي
267	38	24	بنت عم		9			1		ريف	اسسي
268	36	28	بنت خال		10			1		ريف	ثانوية
269	60	49	بنت عمة		14			2	1	ريف	ثانوية
270	70	55	بنت خال		38			1		مدينة	ثانوية
271	30	24	بنت عم		23			1		ريف	امي
272	45	30	بنت عم		10			2		مدينة	أساسي
273	44	35	بنت عم		16			1	2	مدينة	جامعي
274	55	40	بنت خال		20					ريف	ثانوية
275	33	25	بت عم	#REF!	5	1	مرض جيني	0	0	المدينه	جامعي
276	45	39	بت عم	#REF!	20	1	مرض جيني	2	2	مدينة	ثانوي
277	45	40	اولاد عم	#REF!	22	0	0	0	1	مدينه	جامعي
278	30	27	أولاد العم	#REF!	10	1	شحنات وظمور بالدماغ	2	1	مدينة	جامعي
279	35	25	اولاد العم	#REF!	10	0	0	1	0	مدينة	اساسي
280	52	45	اولاد العم	#REF!	27	3	ظمور بالدماغ	0	0	مدينة	ثانوي
281	40	37	اولاد العم	#REF!	22	2	ضعف السمع	0	0	ريف	جامعي
282	59	52	اولاد العم	#REF!	32	2	ضعف السمع	0	0	ريف	ثانوي
283	36	32	اولاد الإخوات	#REF!	16	0	0	1	0	ريف	جامعي
284	32	23	اولاد الاخوات	#REF!	5	0	0	2	0	ريف	ثانوي
285	53	47	اولاد العم	#REF!	31	1	ظمور بالدماغ	0	0	ريف	اساسي
286	30	29	ابن الخال	#REF!	12	1	صم بكم	0	0	ريف	ثانوي
287	32	28	اولاد عم	#REF!	12	2	صم بكم	0	0	مدينة	ثانوي
288	45	35	أولاد العم	#REF!	18	0	0	1	0	ريف	ثانوي
289	50	45	اولاد العم	#REF!	30	6	مرض القلب	0	6	ريف	اساسي
290	47	40	اولاد العم	#REF!	23	0	0	1	0	مدينة	جامعي
291	45	40	اولاد العم	#REF!	24	0	0	2	0	مدينة	جامعي
292	40	32	اولاد العم	#REF!	12	0	0	0	1	ريف	جامعي
293	50	47	اولاد العم	#REF!	31	3	ضعف النظر واحتراف	0	0	مدينة	اساسي
294	50	45	اولاد العم	#REF!	26	3	شحنات وضعف النظر	0	0	مدينة	أساسي
295	47	45	أولاد العم	#REF!	27	0	0	1	0	مدينة	اساسي
296	40	37	اولاد الخالات	#REF!	22	0	0	7	0	ريف	اساسي
297	55	50	اولاد العم	#REF!	33	0	0	1	2	ريف	أُمي
298	27	20	اولاد العم	#REF!	2	1	فقردم انيمياء	0	0	مدينة	ثانوي
299	47	40	اولاد العم	#REF!	23	0	0	1	0	مدينة	جامعي
300	45	40	اولاد العم	#REF!	24	0	0	2	0	مدينة	جامعي
301	40	32	أولاد العم	#REF!	16	0	0	0	1	ريف	جامعي
302	39	33	أولاد العم	#REF!	12	1	فقر الدم الثلاسيميا	0	0	ريف	جامعي
303	45	39	اولاد العم	#REF!	17	3	ظمور بالدماغ	0	2	ريف	جامعي
304	53	47	اولاد العم	#REF!	25	2	ظمور بالدماغ	0	1	ريف	اساسي
305	47	35	اولاد العم	#REF!	18	1	ظمور بالدماغ	0	0	ريف	جامعي
306	60	40	اولاد العم	#REF!	22	1	ظمور بالدماغ	0	0	ريف	جامعي
307	21	20	اولاد خاله	#REF!	5	1	ضعف السمع	0	0	ريف	ثانوي
308	61	42	اولاد العم	#REF!	21	0	0	3	0	ريف	ثانوي
309	60	41	اولاد العم	#REF!	21	0	0	1	0	ريف	جامعي
310	42	38	اولاد العم	#REF!	22	4	ظمور وضعف النظر	2	1	مدينة	ثانوي
311	80	75	اولاد العم	#REF!	57	3	ظمور وضعف النظر	3	3	ريف	اساسي
312	60	41	اولاد الاخوال	#REF!	20	0	0	1	1	مدينة	اساسي
313	40	35	عيال الإخوان أو العم	#REF!	20	1	ظمور بالدماغ	1	1	مدينة	اساسي
314	38	33	عيال اخوه	#REF!	18	3	ظمور بالدماغ	0	0	مدينة	ثانوي
315	50	45	عيال الإخوان	#REF!	30	3	ظمور بالدماغ	2	0	مدينة	جامعي
316	47	47	عيال الإخوان	#REF!	30	0	0	1	0	مدينة	ثانوي
317	46	42	عيال العم	#REF!	19	0	0	1	1	مدينة	ثانوي
318	30	24	اولاد العم	#REF!	5	1	اعصاب	0	0	مدينة	ثانوي
319	38	36	اولاد العم	#REF!	20	0	0	1	0	مدينة	ثانوي
320	45	35	اولاد العم	#REF!	18	0	0	3	0	مدينة	جامعي
321	50	48	اولاد العم	#REF!	27	1	ضعف النظر	0	0	مدينة	ثانوي
322	32	29	أولاد العم	#REF!	14	2	شحنات بالدماغ	1	2	مدينة	ثانوي
323	40	35	ابن الخال	#REF!	16	0	0	0	2	مدينة	جامعي
324	40	39	ابن الخال	#REF!	18	2	ظمور بالدماغ	0	2	ريف	جامعي
325	60	50	إبن العمه	#REF!	36	0	0	0	2	ريف	جامعي
326	39	36	اولاد العم	#REF!	11	0	0	1	0	ريف	ثانوي
327	39	28	ابن العم	#REF!	9	1	ضعف السمع والنطق	0	0	ريف	ثانوي
328	39	35	ابن الخال	#REF!	10	0	0	1	0	ريف	ثانوي
329	47	45	بن عم	#REF!	26	0	0	1	0	مدينة	ثانوي
330	45	32	اولاد العم	#REF!	18	1	انحراف بالقدم	3	0	مدينة	جامعي
331	49	40	اولاد العم	#REF!	22	0	0	2	0	مدينة	ثانوي
332	45	42	اولاد خال	#REF!	24	0	0	1	0	مدينة	ثانوي
333	32	27	اولاد العم	#REF!	9	1	اختلال في الدماغ	0	0	مدينة	أساسي
334	45	35	اولاد العم	#REF!	13	2	تشوه خلقي	0	2	مدينة	ثانوي
335	45	41	اولاد العم	#REF!	19	2	اختلال في الدماغ	0	1	ريف	ثانوي
336	64	60	اولاد العم	#REF!	45	2	اختلال في الدماغ	0	2	ريف	اميين
337	33	26	إبن الجد	#REF!	9	1	ظمور بالدماغ	0	1	مدينة	ثانوي
338	59	45	بن عم	#REF!	22	3	طفح جلدي	0	1	مدينة	ثانوي
339	46	31	بن عم	#REF!	12	1	صم بكم	1	0	مدينة	ثانوي
340	52	37	بن عم	#REF!	18	2	طفح جلدي	0	0	مدينة	ثانوي
341	43	29	بن عمه	#REF!	10	2	طفح جلدي	0	0	مدينة	ثانوي
342	50	48	بنت خالته	#REF!	25	5	أمراض القلب ومعاقين	2	1	ريف	جامعي
343	46	35	بنت خالته	#REF!	20	2	معاق سرطان الدم وصمام القلب	0	1	ريف	جامعي
344	29	22	بنت عمته	#REF!	5	1	ظمور بالدماغ	1	0	ريف	جامعي
345	40	35	بنت خالته	#REF!	19	1	صم بكم وعجم	0	0	مدينة	جامعي
346	50	40	ابن العم	#REF!	17	0	0	0	1	مدينة	ثانوي
347	50	48	اولاد العم	#REF!	30	1	منقول	3	0	مدينة	ثانوي
348	50	47	عيال الاخوات	#REF!	28	1	منقول	1	1	مدينة	ثانوي
349	55	50	اولاد العم	#REF!	35	2	شحنات بالدماغ	0	2	ريف	جامعي
350	38	37	بنت الخال	#REF!	18	0	0	3	0	مدينة	ثانوي
351	75	68	عيال الخالات	#REF!	50	1	منقول	0	2	مدينة	جامعي
352	45	40	عيال الاخوات	#REF!	23	1	ظمور بالدماغ	0	2	مدينة	أساسي
353	58	55	ابن الخال	#REF!	35	3	ضعف النظر	3	0	مدينة	أساسي
354	55	53	عيال العم	#REF!	31	0	0	1	0	مدينة	جامعي
355	40	38	عيال العم	#REF!	20	0	0	0	1	مدينة	ثانوي
356	28	22	عيال الاخوات	#REF!	5	2	إعاقة ذهنية اوجسديه	0	0	ريف	جامعي
357	50	40	اولاد العم	#REF!	19	1	انحراف نظر ودماغ	1	1	ريف	جامعي
358	40	28	اولاد العم	#REF!	10	0	0	1	0	ريف	ثانوي
359	48	28	اولاد العم	#REF!	6	1	ظمور بالدماغ	0	0	ريف	ثانوي
360	38	35	عيال الاخوات	#REF!	17	1	لا يوجدسمع واعجم	0	0	مدينة	أساسي
361	26	25	اولاد العم	#REF!	5	1	لايوجد سمع واعجم	0	0	مدينة	جامعي
362	37	30	إبن الخال	#REF!	12	2	ظمور بالدماغ	0	0	ريف	أساسي
363	35	27	عيال العم	#REF!	10	1	ظمور بالدماغ	0	3	ريف	ثانوي
364	39	35	عيال العم	#REF!	14	1	ظمور بالدماغ	0	0	مدينة	ثانوي
365	45	40	اولاد العم	#REF!	22	1	ظمور بالدماغ	0	0	مدينة	جامعي
366	55	53	اولاد العم	#REF!	35	4	ظمور بالدماغ	0	4	ريف	ثانوي
367	42	38	ابن خالتها	#REF!	20	3	ظمور بالدماغ	0	2	ريف	ثانوي
368	39	33	بنت الخاله	#REF!	15	3	تحسس	0	3	ريف	أساسي
369	55	44	بن الخاله	#REF!	26	3	ظمور بالدماغ	0	1	مدينة	جامعي
370	36	34	بنت عمته	#REF!	18	2	ظمور بالدماغ	0	2	ريف	أساسي
371	53	50	أولاد العم	#REF!	34	2	مرض التوحد	0	2	مدينة	أساسي
372	46	38	بنت العم		19	6	جينات وراثيه	0	3	مدينة	جامعي
373	50	46	بنت الخاله		17	1	انسداد فتحة الشرج	0	0	مدينة	ثانوي
374	65	60	بنت العمه		35	3	اعاقة عقلية	4	1	مدينة	ثانوي
375	25	20	بنت الخاله		4	2	اعاقه عقليه	0	2	ريف	اساسي
376	48	45	بنت العم		26	2	تكسر بالدم	0	0	ريف	امي
377	50	35	بنت العم		20	1	منقولي	2	0	ريف	ثانوي
378	45	39	بنت العم		5	1	ضمور في دماغ	0	0	ريف	امي
379	52	42	بنت العم		20	2	ضمور في دماغ	0	1	مدينة	امي
380	32	26	بنت العم		7	0	0	4	0	ريف	ثانوي
381	50	42	بنت العمه		16	3	ضمور في دماغ	0	0	ريف	امي
382	53	48	بنت العم		27	3	اعاقه حركيه وضعف السمع	0	0	مدينة	جامعي
383	42	30	بنت عم		16	3	خلل هرموني	0	2	مدينة	جامعي
384	35	28	بنت الخال		13	2	تشوه الارجل والنطق	3	1	ريف	اساسي
385	30	24	بنت الخال		9	0	0	0	0	مدينة	ثانوي
386	52	43	بنت العم		25	3	ضمور في دماغ	4	3	مدينة	اساسي
387	50	37	بنت العم		25	1	ضمور في دماغ	0	0	ريف	اساسي
388	27	18	بنت الجد		2	1	تشوهات خلقيه	0	0	ريف	ثانوي
389	53	40	بنت الخاله		24	4	سكري ونقص مناعه	0	0	ريف	اساسي
390	67	55	بنت العم		40	6	اعاقه عقليه وجسدية	1	3	ريف	امي
391	52	50	بنت العم		32	3	اعاقه عقليه	1	0	ريف	اساسي
392	44	35	بنت الخال		18	3	اعاقه جسدية وضعف	0	3	ريف	ثانوي
393	40	35	بنت العمه		15	3	اعاقة جسدية وضعف	0	3	ريف	اساسي
394	40	32	بنت العمه		12	2	اعاقة جسدية وضعف	0	2	ريف	اساسي
395	26	20	بنت الجد		5	2	اعاقة جسدية وضعف	0	2	ريف	ثانوي
396	36	27	بنت العم		4	2	اعاقة جسدية وضعف	0	2	ريف	ثانوي
397	37	32	بنت الخاله		16	2	ضمور في دماغ	0	0	مدينة	ثانوي
398	56	46	بنت العم		25	1	ضمور في دماغ	0	0	ريف	جامعي
399	33	24	بنت الخاله		7	2	فتحة القلب	0	0	ريف	ثانوي
400	45	36	بنت الجد		23	3	تقشرات في الجلد	1	3	ريف	جامعي
401	35	26	بنت الخاله		11	3	تقشرات في جسم	0	2	مدينة	ثانوي
402	40	34	بنت العم		18	1	اعاقة جسدية	0	1	ريف	اساسي
403	30	23	بنت الخال		4	2	اعاقة عقلية وجسدية	0	1	ريف	جامعي
404	38	32	بنت الخال		10	2	تقشرات وحمئ	1	2	ريف	اساسي
405	53	50	بنت العم		38	3	اعاقة عقلية	2	1	ريف	امي
406	40	34	بنت العمه		25	2	اعاقه عقليه وحركيه	0	0	ريف	جامعي
407	50	35	بنت العمه		23	4	سكري صم بكم	2	4	ريف	جامعي
408	57	52	بنت الخال		37	1	اعاقة عقلية	4	0	ريف	ثانوي
409	50	40	بنت الخال		22	3	سكري صم بكم	0	0	ريف	جامعي
410	45	35	بنت العم		25	2	ضمور في دماغ	0	1	ريف	اساسي
411	50	48	بنت العمه		35	1	ضمور بنمو عظام	1	1	ريف	اساسي
412	30	28	بنت العمه		10	3	ضمور في دماغ	1	3	رسف	اساسي
413	47	40	بنت الخال		10	3	صم بكم	1	3	ريف	جامعي
414	60	55	بنت العمه		45	3	اعاقة عقلية	0	0	ريف	امي
415	44	40	بنت العم		20	2	منقولين	0	1	ريف	اساسي
416	46	43	بنت الخاله		30	2	امراض جلدية	0	2	ريف	جامعي
417	45	40	بنت الخاله		29	3	انسداد الامعاء	2	2	ريف	اساسي
418	60	55	بنت الخاله		39	2	منقولين	0	2	ريف	اساسي
419	33	30	بنت العم		15	1	اعاقة جسدية	2	0	ريف	امي
420	29	27	بنت الخال		13	1	اعاقة جسدية	3	0	ريف	امي
421	27	25	بنت العم		12	1	اعاقة جسدية	1	0	ريف	امي
422	40	37	بنت العم		16	2	اعاقة عقلية	0	0	ريف	امي
423	37	33	بنت الخاله		22	1	اعاقة عقلية	0	0	ريف	امي
424	73	60	بنت العم		40	1	اعاقة عقلية	3	0	ريف	امي
425	50	45	بنت العم		28	2	اعاقة عقلية	0	0	مدينة	امي
426	45	40	بنت العم		23	1	اعاقة سمعيه	0	0	مدينة	امي
427	35	30	بنت الجد		13	1	اعاقة عقلية	1	0	ريف	امي
428	45	42	بنت العم		0	2	اعاقة جسدية	0	0	ريف	امي
429	36	27	بنت الخاله		12	3	امراض جلدية	0	2	ريف	ثانوي
430	42	33	بنت العم		19	2	تشوهات خلقيه	1	1	ريف	ثانوي
431	31	24	بنت الخال		5	2	تشوهات خلقيه	0	1	ريف	ثانوي
432	36	27	بنت العمه		10	1	تشوهات خلقيه	3	1	ريف	ثانوي
433	28	24	بنت الخال		7	0	0	2	0	ريف	ثانوي
434	60	46	بنت العم		15	2	منقولين	2	1	ريف	اساسي
435	39	32	بنت الخال		12	3	مرض جلدي	2	2	ريف	اساسي
436	42	33	بنت العم		19	1	تكسر في دم	0	0	ريف	اساسي
437	27	19	بنت العم		4	1	تشوهات خلقيه	0	0	مدينة	ثانوي
438	25	23	بنت العم		10	1	انسداد فتحة الشرج	0	0	مدينه	ثانوي
439	53	44	بنت العم		30	2	تكسرات الدم	0	0	مدينه	ثانوي
440	31	25	بنت الخال		10	0	0	0	0	مدينه	ثانوي
441	30	24	بنت العم		6	0	0	0	0	مدينه	ثانوي
442	32	28	بنت الجد للاب		10	2	نقص صبغة الميلانين	0	0	مدينه	ثانوي
443	35	28	بنت العم		12	2	نقص نمو	0	0	ريف	جامعي
444	53	46	بنت الخال		30	5	تكسرات الدم	0	0	ريف	اساسي
445	60	50	بنت العم		30	4	مرض جلدي	1	1	ريف	اساسي
446	50	38	بنت العم		23	2	صم وبكم وعمى	2	0	ريف	امي
447	60	55	بنت الخال		35	6	اعاقه عقليه	0	1	ريف	ثانوي
448	50	45	بنت الجد		22	3	صم بكم	0	0	ريف	ثانوي
449	38	30	بنت العمه		9	1	منقولي	0	0	ريف	ثانوي
450	45	40	بنت الخال		12	2	صم بكم عمى	0	0	ريف	ثانوي
451	35	30	بنت الخال		5	0	0	2	0	ريف	اساسي
452	43	39	بنت العمه		14	3	تشوه خلقي	1	2	ريف	اساسي
453	40	33	بنت العم		10	2	صم بكم	0	1	ريف	اساسي
454	40	33	بنت العمه		10	1	منقولي	0	0	ريف	اساسي
455	50	48	بنت الخال		30	2	اعاقه جسديه	0	1	ريف	اساسي
456	55	52	بنت العمه		30	6	تقشر الجسم	2	6	مدينه	اساسي
457	41	37	بنت العمه		20	5	تكسرات الدم	2	2	ريف	اساسي
458	65	60	بنت الخال		45	3	تكسرات الدم	1	2	ريف	اساسي
459	50	40	بنت العم		20	1	تشوه خلقي	0	0	مدينه	جامعي
460	64	55	بنت العم		45	1	اعاقه جسديه	2	0	مدينه	اساسي
461	50	45	بنت العم		35	2	ضمور الدماغ	3	2	مدينه	امي
462	52	44	بنت العم		36	4	ضمور الدماغ	0	3	مدينه	امي
463	52	49	بنت الخاله		40	2	اعاقه جسديه	2	1	مدينه	ثانوي
464	31	23	بنت العم		9	0	0	2	0	مدينه	امي
465	55	45	بنت الخاله		20	1	تكسرات الدم	0	0	ريف	اساسي
466	50	44	بنت الجد للاب		22	3	صم بكم	0	0	ريف	ثانوي
467	38	30	بنت العمه		9	2	منقولي	0	1	ريف	امي
468	45	43	بنت الخال		12	3	صم بكم عمي	0	0	ريف	اساسي
469	60	50	بنت الجد		30	5	مختل عقلي	0	0	ريف	امي
470	49	40	بنت العم		16	2	خلل عقلي	0	0	ريف	اساسي
471	46	44	بنت الخاله		22	1	اعاقه جسديه	0	0	ريف	اساسي
472	47	39	بنت الخال		14	1	صم بكم	0	0	ريف	اساسي
473	40	33	بنت العمه		10	1	منقولي	0	0	ريف	امي
474	40	31	بنت الخال		13	1	صم بكم	0	0	مدينه	ثانوي
475	42	37	بنت العمه		21	3	ضمور الدماغ	2	1	ريف	ثانوي
476	35	32	بنت العم		17	1	صرع	2	0	مدينه	ثانوي
477	50	48	بنت العمه		30	3	صم بكم اعاقه	2	1	مدينه	ثانوي
478	60	50	بنت العمه		21	4	اعاقه وضعف النمو	2	2	مدينه	ثانوي
479	40	30	بنت العم		22	1	توحد	0	0	مدبنه	ثانوي
480	42	30	بنت الخال		15	1	اعاقه جسديه	9	0	ريف	اساسي
481	36	27	بنت العم		9	0	0	0	0	مدينه	اساسي
482	30	25	بنت العم		9	1	منقولي	0	0	مدينه	جامعي
483	50	46	بنت العم		27	3	اعاقه حركيه	0	0	مدينه	جامعي
484	65	60	بنت العم		30	4	نقص صبغة الميلانين	0	0	مدينه	ثانوي
485	45	40	بنت الخاله		20	2	تاخر النمو	2	0	مدينه	ثانوي
486	52	48	بنت العم		20	1	سيوله الدم	2	0	مدينه	ثانوي
487	45	40	بنت العمه		32	3	مرض اولاد القمر	0	0	مدينه	ثانوي
488	40	35	بنت العم		25	2	مرض اولاد القمر	0	0	مدينه	ثانوي
489	35	31	بنت العمه		23	2	مرض اولاد القمر	0	1	مدينه	ثانوي
490	50	48	بنت الخال		30	2	اعاقه جسديه	0	1	ريف	اساسي
491	34	25	بنت الخاله		11	2	ضمور وعمى	2	0	ريف	ثانوي
492	43	31	بنت العم		13	3	ضمور وتشوه خلقي	1	3	ريف	ثانوي
493	32	29	بنت الجد للام		12	4	ضمور	1	2	ريف	ثانوي
494	29	27	بنت العم		10	1	ضمور	0	0	ريف	جامعي
495	45	32	بنت العم		20	2	تكسرات الدم	0	1	ريف	ثانوي
496	22	19	بنت العم		3	1	صرع	0	0	مدينه	ثانوي
497	48	42	بنت العم		22	2	توحد وضعف النمو	0	0	مدينه	امي
498	45	32	بنت العم		7	0	0	0	0	مدينه	جامعي
499	46	40	بنت الجد للام		22	1	منقولي	0	0	مدينه	ثانوي
500	42	39	بنت العم		19	4	اعاقه جسديه وعقليه	0	2	ريف	ثانوي
501	36	30	بنت العمه		16	2	ضمور الدماغ	0	0	ريف	ثانوي
502	55	50	بنت العم		30	2	اعاقه عقليه	0	1	ريف	ثانوي
503	49	45	بنت العم		26	4	صم بكم	0	0	ريف	جامعي
504	50	47	بنت الجد للاب		26	2	ضمور الدماغ	0	2	ريف	جامعي
505	40	23	بنت العم		14	2	ضمور الدماغ	0	2	ريف	ثانوي
506	35	32	بنت العمه		12	2	تكسرات الدم	0	1	مدينه	ثانوي
507	58	45	بنت الجد للاب		29	2	ضمور واعاقه ومنقولي	2	1	مدينه	امي
508	36	30	بنت العم		14	1	ضمور واعاقه جسديه	3	0	ريف	اساسي
509	35	28	بنت خالت الام		11	1	ضعف النمو والنظر	1	0	ريف	اساسي
510	41	40	بنت العم		20	2	منقولي	0	0	مدينه	اساسي
511	50	38	بنت العمه		18	2	ضمور واعاقه دائمه	1	1	ريف	اساسي
512	26	20	بنت العم		2	1	استمى	0	0	ريف	اساسي
513	42	35	بنت الخاله		20	2	ضمور واستمى	1	1	ريف	اساسي
514	55	45	بنت العم		26	2	انيمياء المنجليه	0	0	مدينه	امي
515	50	47	بنت العم		17	3	اعاقه وتوحد	0	0	مدينه	ثانوي
516	33	25	بت عم		5	1	مرض جيني	0	0	المدينه	جامعي
517	45	39	بت عم		20	1	مرض جيني	2	2	مدينة	ثانوي
518	45	40	اولاد عم		22	0	0	0	1	مدينه	جامعي
519	30	27	أولاد العم		10	1	شحنات وظمور بالدماغ	2	1	مدينة	جامعي
520	35	25	اولاد العم		10	0	0	1	0	مدينة	اساسي
521	52	45	اولاد العم		27	3	ظمور بالدماغ	0	0	مدينة	ثانوي
522	40	37	اولاد العم		22	2	ضعف السمع	0	0	ريف	جامعي
523	59	52	اولاد العم		32	2	ضعف السمع	0	0	ريف	ثانوي
524	36	32	اولاد الإخوات		16	0	0	1	0	ريف	جامعي
525	32	23	اولاد الاخوات		5	0	0	2	0	ريف	ثانوي
526	53	47	اولاد العم		31	1	ظمور بالدماغ	0	0	ريف	اساسي
527	30	29	ابن الخال		12	1	صم بكم	0	0	ريف	ثانوي
528	32	28	اولاد عم		12	2	صم بكم	0	0	مدينة	ثانوي
529	45	35	أولاد العم		18	0	0	1	0	ريف	ثانوي
530	50	45	اولاد العم		30	6	مرض القلب	0	6	ريف	اساسي
531	47	40	اولاد العم		23	0	0	1	0	مدينة	جامعي
532	45	40	اولاد العم		24	0	0	2	0	مدينة	جامعي
533	40	32	اولاد العم		12	0	0	0	1	ريف	جامعي
534	50	47	اولاد العم		31	3	ضعف النظر واحتراف	0	0	مدينة	اساسي
535	50	45	اولاد العم		26	3	شحنات وضعف النظر	0	0	مدينة	أساسي
536	47	45	أولاد العم		27	0	0	1	0	مدينة	اساسي
537	40	37	اولاد الخالات		22	0	0	7	0	ريف	اساسي
538	55	50	اولاد العم		33	0	0	1	2	ريف	أُمي
539	27	20	اولاد العم		2	1	فقردم انيمياء	0	0	مدينة	ثانوي
540	47	40	اولاد العم		23	0	0	1	0	مدينة	جامعي
541	45	40	اولاد العم		24	0	0	2	0	مدينة	جامعي
542	40	32	أولاد العم		16	0	0	0	1	ريف	جامعي
543	39	33	أولاد العم		12	1	فقر الدم الثلاسيميا	0	0	ريف	جامعي
544	45	39	اولاد العم		17	3	ظمور بالدماغ	0	2	ريف	جامعي
545	53	47	اولاد العم		25	2	ظمور بالدماغ	0	1	ريف	اساسي
546	47	35	اولاد العم		18	1	ظمور بالدماغ	0	0	ريف	جامعي
547	60	40	اولاد العم		22	1	ظمور بالدماغ	0	0	ريف	جامعي
548	21	20	اولاد خاله		5	1	ضعف السمع	0	0	ريف	ثانوي
549	61	42	اولاد العم		21	0	0	3	0	ريف	ثانوي
550	60	41	اولاد العم		21	0	0	1	0	ريف	جامعي
551	42	38	اولاد العم		22	4	ظمور وضعف النظر	2	1	مدينة	ثانوي
552	80	75	اولاد العم		57	3	ظمور وضعف النظر	3	3	ريف	اساسي
553	60	41	اولاد الاخوال		20	0	0	1	1	مدينة	اساسي
554	40	35	عيال الإخوان أو العم		20	1	ظمور بالدماغ	1	1	مدينة	اساسي
555	38	33	عيال اخوه		18	3	ظمور بالدماغ	0	0	مدينة	ثانوي
556	50	45	عيال الإخوان		30	3	ظمور بالدماغ	2	0	مدينة	جامعي
557	47	47	عيال الإخوان		30	0	0	1	0	مدينة	ثانوي
558	46	42	عيال العم		19	0	0	1	1	مدينة	ثانوي
559	30	24	اولاد العم		5	1	اعصاب	0	0	مدينة	ثانوي
560	38	36	اولاد العم		20	0	0	1	0	مدينة	ثانوي
561	45	35	اولاد العم		18	0	0	3	0	مدينة	جامعي
562	50	48	اولاد العم		27	1	ضعف النظر	0	0	مدينة	ثانوي
563	32	29	أولاد العم		14	2	شحنات بالدماغ	1	2	مدينة	ثانوي
564	40	35	ابن الخال		16	0	0	0	2	مدينة	جامعي
565	40	39	ابن الخال		18	2	ظمور بالدماغ	0	2	ريف	جامعي
566	60	50	إبن العمه		36	0	0	0	2	ريف	جامعي
567	39	36	اولاد العم		11	0	0	1	0	ريف	ثانوي
568	39	28	ابن العم		9	1	ضعف السمع والنطق	0	0	ريف	ثانوي
569	39	35	ابن الخال		10	0	0	1	0	ريف	ثانوي
570	47	45	بن عم		26	0	0	1	0	مدينة	ثانوي
571	45	32	اولاد العم		18	1	انحراف بالقدم	3	0	مدينة	جامعي
572	49	40	اولاد العم		22	0	0	2	0	مدينة	ثانوي
573	45	42	اولاد خال		24	0	0	1	0	مدينة	ثانوي
574	32	27	اولاد العم		9	1	اختلال في الدماغ	0	0	مدينة	أساسي
575	45	35	اولاد العم		13	2	تشوه خلقي	0	2	مدينة	ثانوي
576	45	41	اولاد العم		19	2	اختلال في الدماغ	0	1	ريف	ثانوي
577	64	60	اولاد العم		45	2	اختلال في الدماغ	0	2	ريف	اميين
578	33	26	إبن الجد		9	1	ظمور بالدماغ	0	1	مدينة	ثانوي
579	59	45	بن عم		22	3	طفح جلدي	0	1	مدينة	ثانوي
580	46	31	بن عم		12	1	صم بكم	1	0	مدينة	ثانوي
581	52	37	بن عم		18	2	طفح جلدي	0	0	مدينة	ثانوي
582	43	29	بن عمه		10	2	طفح جلدي	0	0	مدينة	ثانوي
583	50	48	بنت خالته		25	5	أمراض القلب ومعاقين	2	1	ريف	جامعي
584	46	35	بنت خالته		20	2	معاق سرطان الدم وصمام القلب	0	1	ريف	جامعي
585	29	22	بنت عمته		5	1	ظمور بالدماغ	1	0	ريف	جامعي
586	40	35	بنت خالته		19	1	صم بكم وعجم	0	0	مدينة	جامعي
587	50	40	ابن العم		17	0	0	0	1	مدينة	ثانوي
588	50	48	اولاد العم		30	1	منقول	3	0	مدينة	ثانوي
589	50	47	عيال الاخوات		28	1	منقول	1	1	مدينة	ثانوي
590	55	50	اولاد العم		35	2	شحنات بالدماغ	0	2	ريف	جامعي
591	38	37	بنت الخال		18	0	0	3	0	مدينة	ثانوي
592	75	68	عيال الخالات		50	1	منقول	0	2	مدينة	جامعي
593	45	40	عيال الاخوات		23	1	ظمور بالدماغ	0	2	مدينة	أساسي
594	58	55	ابن الخال		35	3	ضعف النظر	3	0	مدينة	أساسي
595	55	53	عيال العم		31	0	0	1	0	مدينة	جامعي
596	40	38	عيال العم		20	0	0	0	1	مدينة	ثانوي
597	28	22	عيال الاخوات		5	2	إعاقة ذهنية اوجسديه	0	0	ريف	جامعي
598	50	40	اولاد العم		19	1	انحراف نظر ودماغ	1	1	ريف	جامعي
599	40	28	اولاد العم		10	0	0	1	0	ريف	ثانوي
600	48	28	اولاد العم		6	1	ظمور بالدماغ	0	0	ريف	ثانوي
601	38	35	عيال الاخوات		17	1	لا يوجدسمع واعجم	0	0	مدينة	أساسي
602	26	25	اولاد العم		5	1	لايوجد سمع واعجم	0	0	مدينة	جامعي
603	37	30	إبن الخال		12	2	ظمور بالدماغ	0	0	ريف	أساسي
604	35	27	عيال العم		10	1	ظمور بالدماغ	0	3	ريف	ثانوي
605	39	35	عيال العم		14	1	ظمور بالدماغ	0	0	مدينة	ثانوي
606	45	40	اولاد العم		22	1	ظمور بالدماغ	0	0	مدينة	جامعي
607	55	53	اولاد العم		35	4	ظمور بالدماغ	0	4	ريف	ثانوي
608	42	38	ابن خالتها		20	3	ظمور بالدماغ	0	2	ريف	ثانوي
609	39	33	بنت الخاله		15	3	تحسس	0	3	ريف	أساسي
610	55	44	بن الخاله		26	3	ظمور بالدماغ	0	1	مدينة	جامعي
611	36	34	بنت عمته		18	2	ظمور بالدماغ	0	2	ريف	أساسي
612	53	50	أولاد العم		34	2	مرض التوحد	0	2	مدينة	أساسي
613	52	46	ابن الخال		27					ريف	أساسي
614	35	30	اولاد العم		10					مدينة	جامعي
615	50	47	اولاد العم		28					ريف	اساسي
616	36	34	اولاد العم		16					ريف	ثانوي
617	37	37	اولاد العم		20					ريف	جامعي
618	45	35	أولاد العم		20					مدينة	جامعي
619	40	38	اولاد العم		20					مدينة	جامعي
620	35	30	اولاد العم		13					ريف	ثانوي
621	37	35	اولاد العم		16					مدينة	جامعي
622	35	20	ابن العمه		4					ريف	ثانوي
623	40	28	اولاد العم		10					ريف	ثانوي
624	24	20	اولاد خاله		3					ريف	ثانوي
625	40	28	اولاد العم		7					ريف	ثانوي
626	33	24	إبن العمه		3					ريف	جامعي
627	80	75	اولاد العم		60					ريف	امي
628	31	24	ابن العمه		4					مدينة	ثانوي
629	50	45	اولاد العم		30					مدينة	ثانوي
630	42	40	اولاد العم		24					ريف	جامعي
631	40	38	عيال الاخوات		20					مدينة	ثانوي
632	35	30	ابن الخال		10					مدينة	جامعي
633	60	55	ابن الخال		36					مدينة	ثانوي
634	28	24	اولاد الاخوات		9					مدينة	ثانوي
635	28	22	عيال الاخوات		2					مدينة	ثانوي
636	39	29	اولاد العم		9					ريف	جامعي
637	23	17	اولاد العم		1					ريف	ثانوي
638	40	34	اولاد العم		18					ريف	جامعي
639	42	36	إبن الخال		20					مدينة	ثانوي
640	47	41	اولاد العم		26					مدينة	أساسي
641	47	43	إبن الخال		19					مدينة	ثانوي
642	40	38	اولاد العم		16					ريف	جامع
643	35	25	بن عم		10					مدينة	ثانوي
644	27	19	بن عم		4					مدينة	ثانوي
645	29	24	إبن الخال		6					مدينة	جامعي
646	32	26	اولاد العم		10					ريف	ثانوي
647	34	26	اولاد العم		6					مدينة	ثانوي
648	52	50	اولاد العم		34					مدينة	أساسي
649	50	45	اولاد العم		26					ريف	أساسي
650	29	27	ابن الخال		3					مدينة	ثانوي
651	40	35	ابن الخال		13					مدينة	ثانوي
652	35	32	ابن العم		13					مدينة	ثانوي
653	32	30	عيال الاخوات		10					مدينة	ثانوي
654	30	25	اولاد العم		9					مدينة	ثانوي
655	48	45	اولاد العم		27					مدينة	أساسي
656	35	33	اولاد العم		16					مدينة	أساسي
657	43	30	اولاد العم		12					مدينة	ثانوي
658	28	25	اولاد العم		9					مدينة	ثانوي
659	25	23	اولاد العم		6					مدينة	جامعي
660	26	22	ابن العمه		6					مدينة	جامعي
661	32	22	ابن الخال		7					مدينة	ثانوي
662	52	47	ابن العمه		31					مدينة	جامعي
663	35	27	ابن العمه		8					مدينة	ثانوي
664	40	38	ابن الخال		21					مدينة	جامعي
665	32	27	إبن العم		12					ريف	ثانوي
666	35	27	ابن العم		11					مدينة	جامعي
667	35	32	اولاد العم		16					مدينة	ثانوي
668	36	35	اولاد العم		15					مدينة	ثانوي
669	80	75	اولاد العم		60					ريف	امي
670	32	21	عيال الاخوات		5					ريف	جامعي
671	36	28	ابن العمه		10					ريف	ثانوي
672	38	24	ابن الخال		4					ريف	ثانوي
673	40	30	ابن الخال		12					ريف	ثانوي
674	35	29	إبن العم		6					ريف	أساسي
675	30	26	ابن عمتها		9					ريف	ثانوي
676	28	23	ابن العم		6					ريف	ثانوي
677	36	23	ابن العم		8					ريف	ثانوي
678	30	25	بنت العم		13					مدينه	ثانوي
679	28	22	بنت الخال		6					مدينه	جامعي
680	35	22	بنت العم		6					مدينه	جامعي
681	33	25	بنت العم		6					مدينه	ثانوي
682	70	60	بنت العم		43					ريف	ثانوي
683	45	36	بنت العم		15					مدينه	ثانوي
684	35	26	بنت الخال		5					ريف	ثانوي
685	35	28	بنت العمه		11					مدينه	جامعي
686	30	25	بنت الخال		8					مدينه	ثانوي
687	52	46	بنت العمه		31					مدينه	اساسي
688	26	21	بنت العمه		2					مدينه	اساسي
689	44	42	بنت العم		18					مدينه	ثانوي
690	38	32	بنت الجد		16					مدينه	ثانوي
691	48	42	بنت الجد		24					مدينه	ثانوي
692	44	38	بنت الجد		20					مدينه	ثانوي
693	50	44	بنت العم		28					ريف	اساسي
694	40	35	بنت العم		17					ريف	جامعي
695	50	44	بنت العم		30					ريف	جامعي
696	37	32	بنت العم		16					ريف	ثانوي
697	30	25	بنت العم		5					ريف	جامعي
698	30	26	بنت الخاله		9					ريف	اساسي
699	32	28	بنت الخال		11					ريف	ثانوية
700	35	20	بنت العم		6					ريف	جامعي
701	45	42	بنت العم		27					مدينه	جامعي
702	45	36	بنت العم		24					مدينه	ثانوي
703	34	25	بنت العم		11					مدينه	ثانوي
704	46	37	بنت العمه		25					ريف	ثانوي
705	55	47	بنت العم		28					ريف	ثانوي
706	38	32	بنت العم		16					مدينه	ثانوي
707	35	24	بنت العم		4					مدينه	ثانوي
708	45	39	بنت العم		16					مدينه	ثانوي
709	59	56	بنت العمه		25					ريف	اساسي
710	44	35	بنت العم		7					مدينه	امي
711	43	37	بنت الخال		15					ريف	امي
712	37	18	بنت العم		2					مدينه	امي
713	40	32	بنت العم		10					مدينه	ثانوي
714	28	23	بنت العمه		5					ريف	اساسي
715	45	38	بنت العم		28					ريف	ثانوي
716	53	50	بنت الخال		36					ريف	اساسي
717	30	26	بنت الخاله		8					ريف	ثانوي
718	38	24	بنت الخاله		9					ريف	اساسي
719	27	23	بنت العم		5					ريف	اساسي
720	37	32	بنت العم		15					ريف	جامعي
721	25	20	بنت العم		4					ريف	جامعي
722	45	27	بنت العمه		13					ريف	ثانوي
723	40	29	بنت العم		13					مدينه	ثانوي
724	30	22	بنت العم		5					مدينه	ثانوي
725	45	40	بنت الخال		5					مدينه	ثانوي
726	37	33	بنت الخال		16					مدينه	ثانوي
727	55	47	بنت الخال		30					مدينه	ثانوي
728	56	45	بنت العم		30					مدينه	جامعي
729	60	47	بنت العم		33					مدينه	ثانوي
730	30	23	بنت العم		6					مدينه	ثانوي
731	60	43	بنت العم		36					مدينه	ثانوي
732	30	23	بنت العم		7					مدينه	جامعي
733	56	48	بنت العم		30					مدينه	ثانوي
734	35	29	بنت الخاله		13					مدينه	ثانوي
735	55	48	بنت الخال		30					ريف	ثانوي
736	38	36	بنت العم		20					ريف	ثانوي
737	45	38	بنت العمه		10					مدينه	ثانوي
738	53	38	بنت العمه		19					ريف	اساسي
739	50	41	بنت الخال		20					ريف	امي
740	50	42	بنت العم		25					ريف	اساسي
741	35	30	بنت الجد		5					ريف	اساسي
742	42	35	بنت العم		25					مدينه	جامعي
743	45	34	بنت العمه		21					مدينه	جامعي
744	40	39	بنت العم		20					مدينه	جامعي
745	39	29	بنت العم		18					مدينه	جامعي
746	45	30	بنت الخال		25					مدينه	جامعي
747	39	29	بنت العمه		8					مدينه	جامعي
748	40	37	بنت العم		17					مدينه	جامعي
749	34	30	بنت العم		13					مدينه	جامعي
750	52	47	بنت العم		30					مدينه	جامعي
751	30	28	بنت العمه		8					مدينه	جامعي
752	32	30	بنت العم		14					مدينه	جامعي
753	35	30	بنت الخال		17					مدينه	جامعي
754	35	30	بنت العم		20					مدينه	ثانوي
755	31	30	بنت الخال		10					مدينه	جامعي
756	29	25	بنت العم		7					مدينه	اساسي
757	29	32	بنت الخاله		10					ريف	اساسي
758	38	29	بنت الخاله		11					مدينه	جامعي
759	35	26	بنت الجد للاب من بعيد		13					ريف	اساسي
760	37	35	بنت العم		19					مدينه	اساسي
761	40	38	بنت العم		27					مدينه	ثانوي
762	40	32	بنت العم		17					مدينه	ثانوي
763	50	45	بنت الخاله		22					ريف	اساسي
764	48	45	بنت العم		20					ريف	اساسي
765	32	29	بنت الخاله		12					ريف	اساسي
766	45	43	بنت العم		22					ريف	اساسي
767	50	45	بنت العم		20					ريف	اساسي
768	29	27	بنت الخاله		12					ريف	اساسي
769	45	38	بنت الخاله		13					مدينة	ثانوي
770	29	26	بنت العم		12					ريف	اساسي
771	27	20	بنت العم		1					ريف	اساسي
772	28	22	بنت العم		5					مدينة	ثانوي
773	35	22	بنت الخاله		7					مدينة	ثانوي
774	40	26	بنت الخاله		9					مدينة	ثانوي
775	40	23	بنت الخاله		3					مدينة	ثانوي
776	24	20	بنت العمه		1					ريف	اساسي
777	24	22	بنت الخاله		2					ريف	اساسي
778	45	28	بنت العم		0.12					ريف	اساسي
779	28	22	بنت العم		7					ريف	اساسي
780	30	22	بنت العمه		7					ريف	اساسي
781	25	25	بنت العمه		5					ريف	اساسي
782	45	28	بنت الخاله		12					ريف	اساسي
783	45	27	بنت العمه		10					ريف	اساسي
784	50	28	بنت العمه		16					ريف	اساسي
785	27	20	بنت العم		3					ريف	اساسي
786	50	46	بنت العم		20					ريف	اساسي
787	28	18	بنت الخاله		2					ريف	اساسي
788	32	24	بنت الخال		7					ريف	اساسي
789	30	24	بنت العمه		2					ريف	اساسي
790	50	40	بنت العم		24					ريف	اساسي
791	51	50	بنت الخال		13					ريف	اساسي
792	45	28	بنت العمه		12					ريف	اساسي
793	50	38	بنت العمه		22					ريف	اساسي
794	38	22	بنت العم		9					ريف	اساسي
795	40	40	بنت خاله	0	15					مدينة	ثانوية
796	35	30	بنت خاله	0	3					مدينة	أساسي
797	45	44	بنت خاله	0	13					مدينة	ثانوية
798	40	35	بنت العم	0	16					مدينة	ثانوية
799	38	30	بنت خالة	0	7					مدينة	ثانوية
800	55	51	بنت خال	0	30					ريف	أساسي
801	48	42	بنت عمة	0	18					ريف	ثانوية
802	43	40	بنت عمة	0	12					ريف	ثانوية
803	25	24	بنت عمة	0	8					ريف	ثانوية
804	48	40	بنت عمة	0	19					مدينة	ثانوية
805	45	43	بنت عمة	0	25					مدينة	ثانوية
806	38	35	بنت عم	0	15					ريف	ثانوية
807	26	25	بنت عم	0	8					مدينة	ثانوية
808	30	28	بنت عم	0	8					ريف	ثانوية
809	38	37	بنت عم	0	10					مدينة	ثانوية
810	58	55	بنت عمة	0	28					ريف	ثانوية
811	55	51	بنت خال	0	30					ريف	أساسي
812	45	43	بنت خال	0	18					ريف	ثانوية
813	55	52	بنت عم	0	20					ريف	ثانوية
814	30	23	بنت عمة	0	5					ريف	جامعي
815	60	55	بنت عمة	0	38					ريف	امي
816	32	25	بنت خال	0	4					ريف	جامعي
817	42	40	بنت عم	0	21					ريف	جامعي
818	45	42	بنت عم	0	22					مدينة	أساسي
819	35	37	بنت عم	0	10					ريف	ثانوية
820	45	43	بنت خال	0	20					مدينة	جامعي
821	35	37	بنت عم	0	7					مدينة	ثانوية
822	40	32	بنت خال	0	10					ريف	ثانوية
823	40	38	بنت عم	0	15					ريف	ثانوية
824	33	30	بنت عم	0	13					ريف	ثانوية
825	65	60	بنت خال	0	35					ريف	امي
826	40	35	بنت عم	0	14					مدينة	ثانوية
827	35	32	بنت خال	0	13					ريف	ثانوية
828	57	53	بنت خال	0	23					ريف	أساسي
829	55	50	بنت عم	0	28					ريف	ثانوية
830	43	40	بنت خال	0	16					ريف	ثانوية
831	37	34	بنت خال	0	11					ريف	أساسي
832	56	52	بنت عم	0	23					ريف	أساسي
833	27	23	بنت عم	0	6					ريف	أساسي
834	36	33	بنت خالة	0	17					ريف	أساسي
835	52	48	بنت خال	0	30					ريف	ثانوية
836	70	68	بنت خال	0	43					ريف	امي
837	75	71	بنت عم	0	40					ريف	أساسي
838	65	62	بنت خال	0	39					ريف	أساسي
839	78	75	بنت خالة	0	41					ريف	أساسي
840	80	78	بنت عم	0	50					ريف	أساسي
841	73	71	بنت عمة	0	20					ريف	أساسي
842	49	42	بنت عم	0	16					ريف	امي
843	65	62	بنت عم	0	23					ريف	امي
844	72	70	بنت خالة	0	19					ريف	أساسي
845	65	60	بنت عم	0	31					ريف	أساسي
846	63	52	بنت عمة	0	30					ريف	أساسي
847	45	43	بنت خالة	0	20					ريف	أساسي
848	68	58	بنت خال	0	37					ريف	أساسي
849	55	50	بنت خال	0	30					ريف	أساسي
850	60	55	بنت عم	0	40					ريف	أساسي
851	46	43	بنت خال	0	22					ريف	ثانوية
852	66	60	بنت عم	0	37					ريف	أساسي
853	33	29	بنت عم	0	10					ريف	ثانوية
854	50	45	بنت عم	0	20					ريف	جامعي
855	45	35	بنت عم	0	17					ريف	جامعي
856	40	25	بنت خالة	0	10					ريف	أساسي
857	40	30	بنت عم	0	16					ريف	ثانوية
858	37	24	بنت عم	0	10					ريف	جامعي
859	49	40	بنت خال	0	21					ريف	ثانوية
860	57	54	بنت عمة	0	40					ريف	أساسي
861	35	32	بنت عمة	0	1					ريف	ثانوية
862	30	22	بنت خالة	0	3					ريف	ثانوية
863	49	45	بنت عمة	0	22					ريف	أساسي
864	50	42	بنت خالة	0	23					ريف	جامعي
865	39	30	بنت عم	0	11					ريف	ثانوية
866	37	29	بنت عم	0	12					ريف	ثانوية
867	37	32	بنت عم	0	8					ريف	أساسي
868	27	23	بنت عم	0	8					ريف	ثانوية
869	45	39	بنت عم	0	18					ريف	أساسي
870	43	38	بنت عم	0	21					ريف	ثانوية
871	45	40	بنت عم	0	22					ريف	ثانوية
872	27	22	بنت عم	0	3					ريف	ثانوية
873	40	35	بنت خال	0	12					ريف	ثانوية
874	35	25	بنت خال	0	8					ريف	أساسي
875	50	45	بنت خالة	0	28					ريف	أساسي
876	45	40	بنت عم	0	17					ريف	أساسي
877	30	28	بنت عم	0	10					مدينة	ثانوية
878	25	20	بنت عم	0	4					مدينة	ثانوية
879	34	30	بنت عم	0	8					مدينة	ثانوية
880	40	35	بنت خالة	0	15					ريف	أساسي
881	33	23	بنت عم	0	8					ريف	جامعي
882	40	30	بنت خالة	0	12					ريف	جامعي
883	43	37	بنت عمة	0	18					ريف	جامعي
884	47	40	بنت خال	0	22					ريف	جامعي
885	27	20	بنت عم	0	3					ريف	جامعي
886	45	40	بنت عم	0	23					ريف	جامعي
887	35	32	بنت خالة	0	13					ريف	ثانوية
888	37	32	بنت خالة	0	13					ريف	ثانوية
889	48	45	بنت عمة	0	30					ريف	امي
890	50	45	بنت خال	0	23					ريف	جامعي
891	40	35	بنت عم	0	18					ريف	ثانوية
892	42	40	بنت عم	0	22					مدينة	جامعي
893	30	25	بنت عم	0	8					مدينة	ثانوية
894	35	30	بنت خال	0	17					ريف	ثانوية
895	50	47	بنت عم	0	27					مدينة	أساسي
896	37	32	بنت عم	0	15					مدينة	ثانوية
897	30	28	بنت خال	0	10					مدينة	جامعي
898	25	18	بنت عم	0	3					ريف	جامعي
899	28	24	بنت عم	0	7					ريف	جامعي
900	28	21	بنت خال	0	6					ريف	جامعي
901	50	48	بنت عم	0	21					ريف	جامعي
902	29	22	بنت عم	0	1					مدينة	جامعي
903	34	33	بنت خال	0	11					مدينة	جامعي
904	42	35	بنت عم	0	19					مدينة	ثانوية
905	30	20	بنت خالة	0	2					مدينة	اعدادي
906	25	20	بنت خال	0	3					ريف	اعدادي
907	30	25	بنت خال	0	7					ريف	اعدادي
908	50	40	بنت عم	0	22					ريف	ثانوية
909	32	28	بنت خالة	0	13					مدينة	ثانوية
910	30	25	بنت عم	0	8					مدينة	ثانوية
911	68	60	بنت عمة	0	40					ريف	جامعي
912	40	42	بنت خالة	0	15					ريف	ثانوية
913	58	55	بنت عم	0	35					ريف	ثانوية
914	33	25	بنت عمة	0	9					ريف	ثانوية
915	25	20	بنت عم	0	4					ريف	ثانوية
916	25	22	بنت عم	0	4					ريف	ثانوية
917	26	23	بنت عم	0	4					مدينة	ثانوية
918	23	20	بنت خال	0	3					مدينة	ثانوية
919	20	22	بنت عم	0	2					مدينة	جامعي
920	28	25	بنت جد	0	10					ريف	ثانوية
921	36	30	بنت عم	0	6					ريف	ثانوية
922	40	32	بنت خال	0	15					ريف	ثانوية
923	30	25	بنت خال	0	10					ريف	ثانوية
924	45	40	بنت عمة	0	20					ريف	ثانوية
925	27	20	بنت عمة	0	4					ريف	ثانوية
926	40	35	بنت عمة	0	11					ريف	جامعي
927	30	25	بنت عمة	0	3					ريف	جامعي
928	32	25	بنت خالة	0	7					ريف	ثانوية
929	40	35	بنت عمة	0	15					ريف	جامعي
930	40	30	بنت عمة	0	10					ريف	جامعي
931	40	30	بنت جدة	0	5					ريف	ثانوية
932	37	30	بنت عمة	0	7					ريف	ثانوية
933	37	30	بنت عمة	0	7					ريف	جامعي
934	35	28	بنت عم	0	4					مدينة	ثانوية
935	40	25	بنت خالة	0	10					مدينة	امي
936	45	30	بنت خال	0	15					ريف	جامعي
937	29	24	بنت خال	0	8					مدينة	ثانوية
938	50	46	بنت جدة	0	27					ريف	جامعي
939	33	22	بنت عم	0	5					ريف	جامعي
940	60	54	بنت خال	0	30					ريف	جامعي
941	35	25	بنت خال	0	8					ريف	جامعي
942	30	32	بنت عمة	0	15					ريف	امي
943	50	45	بنت خال	0	25					ريف	جامعي
944	60	63	بنت عم	0	35					مدينة	ثانوية
945	55	50	بنت عم	0	30					مدينة	جامعي
946	40	35	بنت عم	0	15					ريف	جامعي
947	35	28	بنت خالة	0	7					ريف	أساسي
948	45	40	بنت خال	0	18					ريف	جامعي
949	43	40	بنت عم	0	20					ريف	ثانوية
950	30	27	بنت عم	0	10					ريف	أساسي
951	47	43	بنت خال	0	20					مدينة	ثانوية
952	50	47	بنت عم	0	27					ريف	أساسي
953	55	50	بنت عم	0	30					ريف	أساسي
954	35	32	بنت خالة	0	13					ريف	ثانوية
955	47	43	بنت خال	0	20					ريف	ثانوية
956	45	41	بنت خال	0	18					ريف	أساسي
957	30	28	بنت عم	0	8					ريف	ثانوية
958	57	54	بنت عم	0	30					ريف	ثانوية
959	39	35	بنت عم	0	17					ريف	ثانوية
960	42	38	بنت عم	0	20					ريف	أساسي
961	45	42	بنت عم	0	25					ريف	جامعي
962	50	48	بنت عم	0	28					ريف	ثانوية
963	38	35	بنت خالة	0	15					مدينة	ثانوية
964	27	23	بنت عم	0	8					ريف	ثانوية
965	32	28	بنت عم	0	13					ريف	أساسي
966	25	20	بنت عم	0	4					ريف	ثانوية
967	55	50	بنت خال	0	28					ريف	جامعي
968	50	45	بنت خالة	0	25					ريف	ثانوية
969	35	32	بنت خال	0	12					مدينة	ثانوية
970	42	40	بنت عم	0	17					ريف	ثانوية
971	45	42	بنت عم	0	20					ريف	ثانوية
972	45	40	بنت عمة	0	15					ريف	ثانوية
973	40	35	بنت عم	0	15					ريف	اعدادي
974	30	25	بنت عمة	0	5					ريف	ثانوية
975	28	25	بنت عم	0	1					ريف	ثانوية
976	55	44	بنت عم	0	27					ريف	أساسي
977	33	28	بنت خال	0	8					ريف	اعدادي
978	30	23	بنت عم	0	4					ريف	جامعي
979	28	23	بنت جد	0	2					ريف	ثانوية
980	35	30	بنت عم	0	8					ريف	جامعي
981	40	39	بنت عم	0	5					ريف	جامعي
982	30	25	بنت جد	0	1					ريف	ثانوية
983	35	30	بنت عم	0	10					ريف	ثانوية
984	55	48	بنت عم	0	30					ريف	ثانوية
985	35	30	بنت خال	0	8					ريف	ثانوية
986	40	36	بنت خالة	0	13					ريف	ثانوية
987	35	30	بنت خالة	0	7					ريف	ثانوية
988	62	60	بنت خالة	0	35					ريف	اعادي
989	37	35	بنت عم	0	12					ريف	اعدادي
990	35	33	بنت عم	0	10					ريف	ثانوية
991	33	30	بن عمة	0	8					ريف	ثانوية
992	55	50	بنت عم	0	30					ريف	ثانوية
993	50	42	بنت خال	0	25					ريف	أساسي
994	35	27	بنت عم	0	7					ريف	أساسي
995	53	41	بنت خالة	0	16					ريف	ثانوية
996	40	35	بنت خال	0	7					ريف	ثانوية
997	35	24	بنت خالة	0	5					ريف	أساسي
998	40	27	بنت عم	0	8					ريف	ثانوية
999	29	22	بنت عم	0	4					ريف	أساسي
1000	42	35	بنت عم	0	10					ريف	ثانوية
1001	46	33	بنت عم	0	18					ريف	أساسي
1002	30	20	بنت عم	0	5					ريف	ثانوية
1003	45	33	بنت خال	0	18					ريف	ثانوية
1004	47	35	بنت خال	0	20					ريف	جامعي
1005	41	45	بنت خال	0	12					ريف	جامعي
1006	40	30	بنت خال	0	13					ريف	جامعي
1007	35	25	بنت عم	0	7					ريف	جامعي
1008	30	22	بنت خال	0	5					ريف	جامعي
1009	28	20	بنت عم	0	3					ريف	جامعي
1010	42	35	بنت عم	0	18					ريف	جامعي
1011	48	40	بنت عم	0	25					ريف	جامعي
1012	45	32	بنت خال	0	15					ريف	جامعي
1013	20	17	بنت خال	0	3					ريف	ثانوية
1014	30	27	ينت عمة	0	10					ريف	جامعي
1015	30	27	بنت عمة	0	11					ريف	ثانوية
1016	30	22	بنت عمة	0	8					ريف	امي
1017	33	27	بنت عمة	0	7					ريف	امي
1018	75	68	بنت خالة	0	51					ريف	جامعي
1019	20	17	بنت خالة	0	1					ريف	ثانوية
1020	43	38	بنت عمة	0	20					ريف	ثانوية
1021	29	25	بنت عمة	0	9					ريف	جامعي
1022	38	28	بنت عمة	0	12					ريف	جامعي
1023	45	40	بنت عمة	0	18					ريف	جامعي
1024	30	27	بنت عمة	0	7					ريف	جامعي
1025	35	28	بنت عمة	0	10					ريف	جامعي
1026	25	20	بنت خالة	0	5					ريف	جامعي
1027	26	20	بنت عمة	0	6					ريف	ثانوية
1028	30	22	بنت جدة	0	8					ريف	جامعي
1029	60	55	بنت عمة	0	25					ريف	ثانوية
1030	20	16	بنت عمة	0	1					ريف	ثانوية
1031	27	23	بنت عم	0	4					ريف	ثانوية
1032	30	27	بنت عمة	0	10					ريف	أساسي
1033	40	35	بنت عمة	0	15					ريف	أساسي
1034	41	39	بنت خالة	0	16					مدينة	ثانوية
1035	38	34	بنت خالة	0	9					ريف	أساسي
1036	32	29	بنت جدة	0	14					ريف	أساسي
1037	28	27	بنت عمة	0	8					مدينة	ثانوية
1038	24	18	بنت عمة	0	4					ريف	أساسي
1039	25	19	بنت خالة	0	5					ريف	أساسي
1040	39	34	بنت عمة	0	20					ريف	أساسي
1041	50	45	بنت عم	0	25					ريف	أساسي
1042	35	32	بنت عمة	0	14					ريف	أساسي
1043	48	40	بنت خالة	0	15					ريف	أساسي
1044	60	58	بنت خال	0	25					ريف	أساسي
1045	42	32	بنت عمة	0	12					ريف	ثانوية
1046	65	63	بنت خالة	0	28					ريف	أساسي
1047	49	45	بنت عم	0	18					ريف	أساسي
1048	45	38	بنت خالة	0	19					ريف	أساسي
1049	32	30	بنت عم	0	12					ريف	أساسي
1050	30	19	بنت عمة	0	5					ريف	أساسي
1051	50	30	بنت خال	0	13					مدينة	أساسي
1052	40	23	بنت خال	0	5					مدينة	ثانوية
1053	35	29	بنت خالة	0	9					ريف	ثانوية
1054	36	21	بنت عمة	0	4					ريف	امي
1055	28	22	بنت عم	0	3					مدينة	ثانوية
1056	27	23	بنت خال	0	3					ريف	امي
1057	45	36	بنت عم	0	16					ريف	ثانوية
1058	47	39	بنت خال	0	14					ريف	ثانوية
1059	40	34	بنت خال	0	14					ريف	أساسي
1060	25	20	بنت عم	0	2					ريف	ثانوية
1061	24	18	بنت عم	0	3					ريف	جامعي
1062	32	24	بنت عم	0	7					ريف	امي
1063	59	40	بنت عم	0	16					ريف	ثانوية
1064	69	47	بنت عمة	0	29					ريف	أساسي
1065	35	27	بنت عم	0	15					مدينة	جامعي
